# Supplementary material for: Ectoine protects DNA from damage by ionizing radiation
Source: PubMed Central journal article supplement (PMC5681641; doi:10.1038/s41598-017-15512-4), 2017-11-10
Supplement: 41598_2017_15512_MOESM1_ESM.pdf [file 41598_2017_15512_MOESM1_ESM.pdf]

## Supplementary information

### Ectoine protects DNA from damage by ionizing radiation

M.- A. Schröter<sup>1</sup>, S. Meyer<sup>1,2</sup>, M. B. Hahn<sup>1,3</sup>, T. Solomun<sup>1</sup>, H. Sturm<sup>1,4</sup>, H. J. Kunte<sup>1\*</sup>

<sup>1</sup>Federal Institute for Materials Research and Testing, D-12205 Berlin, Germany

<sup>2</sup>Institute of Biochemistry and Biology, University of Potsdam, D-14476 Potsdam, Germany

<sup>3</sup>Institute of Experimental Physics, Free University Berlin, Department of Physics, D-14195 Berlin, Germany.

<sup>4</sup>Technical University Berlin, D-10587 Berlin, Germany

S.M. and M.-A.S. contributed equally to this work and should be considered as co-first authors.

\*Hans-Joerg.Kunte@bam.de

**Supplementary Table S1** | Irradiation of pUC19 in water and in 1 M ectoine solution. Acceleration voltage: 30 kV, irradiation time: 300±4 s. Currents, number of primary electrons are measured, the calculation of irradiation doses is based on Hahn *et. al.*<sup>28</sup> (see reference in the main text.) Total error of the currents is less 5%. All samples are analyzed by gel electrophoresis. Samples, which are additionally analyzed with atomic force microscopy, are bold written.

| pUC19 in water  | current [nA] | number of primary electrons [ $\cdot 10^{12}$ ] | effective irradiation dose [Gy] | pUC19 in 1M ectoine solution | current [nA] | number of primary electrons [ $\cdot 10^{12}$ ] | effective irradiation dose [Gy] |
|-----------------|--------------|-------------------------------------------------|---------------------------------|------------------------------|--------------|-------------------------------------------------|---------------------------------|
| control 1       | 0            | 0                                               | 0                               | control 1                    | 0            | 0                                               | 0                               |
| control 2       | 0            | 0                                               | 0                               | control 2                    | 0            | 0                                               | 0                               |
| sample 1        | 0.107        | 0.200                                           | 0.13                            | sample 1                     | 0.115        | 0.216                                           | 0.14                            |
| <b>sample 2</b> | <b>0.163</b> | <b>0.305</b>                                    | <b>0.20</b>                     | <b>sample 2</b>              | <b>0.210</b> | <b>0.394</b>                                    | <b>0.26</b>                     |
| sample 3        | 0.285        | 0.534                                           | 0.36                            | sample 3                     | 0.290        | 0.544                                           | 0.36                            |
| sample 4        | 0.365        | 0.684                                           | 0.46                            | sample 4                     | 0.448        | 0.84                                            | 0.56                            |
| sample 5        | 0.416        | 0.780                                           | 0.52                            | sample 5                     | 0.542        | 1.02                                            | 0.68                            |
| sample 6        | 0.419        | 0.786                                           | 0.52                            | sample 6                     | 0.551        | 1.033                                           | 0.69                            |
| sample 7        | 0.503        | 0.943                                           | 0.63                            | sample 7                     | 0.551        | 1.033                                           | 0.69                            |
| sample 8        | 0.612        | 1.15                                            | 0.76                            | sample 8                     | 7.52         | 14.1                                            | 9.39                            |
| sample 9        | 0.750        | 1.41                                            | 0.94                            | sample 9                     | 7.54         | 14.14                                           | 9.41                            |
| sample 10       | 0.849        | 1.59                                            | 1.06                            | sample 10                    | 8.05         | 15.09                                           | 10.05                           |
| sample 11       | 1.02         | 1.91                                            | 1.27                            | sample 11                    | 9.27         | 17.38                                           | 11.57                           |
| sample 12       | 3.10         | 5.81                                            | 3.87                            | sample 12                    | 9.37         | 17.57                                           | 11.7                            |

|                  |              |              |              |                  |              |              |              |
|------------------|--------------|--------------|--------------|------------------|--------------|--------------|--------------|
| sample 13        | 4.47         | 8.38         | 5.58         | sample 13        | 11.21        | 21.02        | 13.99        |
| sample 14        | 6.22         | 11.67        | 7.76         | sample 14        | 11.23        | 21.06        | 14.02        |
| sample 15        | 7.35         | 13.78        | 9.17         | sample 15        | 12.50        | 23.44        | 15.6         |
| sample 16        | 10.65        | 19.97        | 13.29        | sample 16        | 12.52        | 23.48        | 15.63        |
| <b>sample 17</b> | <b>11.28</b> | <b>21.14</b> | <b>14.07</b> | <b>sample 17</b> | <b>12.68</b> | <b>23.78</b> | <b>15.83</b> |
